# Supplementary material for: Individual variation in natural or manipulated corticosterone does not covary with circulating glucose in a wild bird
Source: Oxford University Press journal article supplement (doi:10.1242/jeb.243262), 2022-01-24
Supplement: jeb243262supp.pdf [file jeb243262supp.pdf]

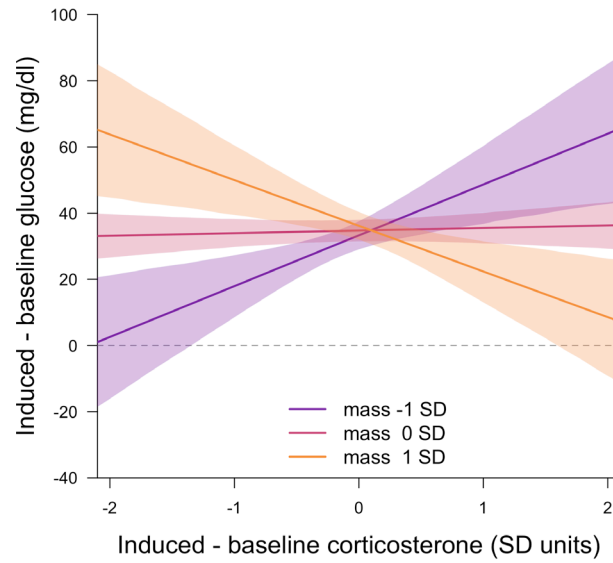

**Fig. S1.** Illustration of the interaction between adult mass and the change in corticosterone from baseline to stress-induced samples as a predictor of the change in glucose concentration over the same time period. Solid lines and shaded regions show the maximum likelihood estimate and 95% confidence interval for the relationship among adults 1 SD below the mean (purple), at the mean mass (red), or 1 SD above the mean (orange). Confidence intervals were computed based on sampling from the fit model (see text).

**Table S1.** Total sample sizes for glucose measurements by year, location, and sample type.

| State | Year | Adults |         |                | Nestlings |         |                |
|-------|------|--------|---------|----------------|-----------|---------|----------------|
|       |      | Base   | Induced | Post-Cortrosyn | Base      | Induced | Post-Cortrosyn |
| NY    | 2016 | 244    | 178     | -              | -         | -       | -              |
| NY    | 2017 | 140    | 138     | -              | -         | -       | -              |
| NY    | 2018 | 188    | 123     | -              | -         | -       | -              |
| NY    | 2019 | 204    | 147     | 45             | 185       | 177     | 159            |
| AK    | 2016 | 117    | 84      | -              | -         | -       | -              |
| AK    | 2017 | 134    | 100     | -              | -         | -       | -              |
| TN    | 2018 | 228    | 167     | -              | -         | -       | -              |
| WY    | 2018 | 236    | 160     | -              | -         | -       | -              |

**Table S2.** Overall Pearson correlation between measures in New York adults

|                         | Base glucose | Induced glucose | Glucose response | Base cort. | Induced cort. | Cort. response |
|-------------------------|--------------|-----------------|------------------|------------|---------------|----------------|
| Base glucose            |              | -               | -                | -          | -             | -              |
| Induced glucose         | 0.26         |                 | -                | -          | -             | -              |
| Glucose response        | -0.40        | 0.78            |                  | -          | -             | -              |
| Base corticosterone     | 0.06         | -0.02           | -0.06            |            | -             | -              |
| Induced corticosterone  | -0.03        | -0.11           | -0.08            | 0.15       |               | -              |
| Corticosterone response | -0.06        | -0.09           | -0.05            | -0.33      | 0.89          |                |

**Table S3.** Results of linear mixed models with glucose or corticosterone as the response and sample type as a categorical predictor.

| Predictors                                           | Adult Corticosterone |               | Adult Glucose       |                 | Nestling Corticosterone |               | Nestling Glucose   |                 |
|------------------------------------------------------|----------------------|---------------|---------------------|-----------------|-------------------------|---------------|--------------------|-----------------|
|                                                      | Estimates            | CI            | Estimates           | CI              | Estimates               | CI            | Estimates          | CI              |
| Intercept (Base / Female)                            | 4.06                 | 2.88 – 5.23   | 213.38              | 210.51 – 216.26 | 6.25                    | 3.14 – 9.37   | 204.21             | 194.81 – 213.61 |
| Induced                                              | 25.74                | 24.29 – 27.18 | 30.71               | 27.25 – 34.16   | 18.70                   | 16.07 – 21.33 | 18.00              | 10.13 – 25.87   |
| Post-Cortrosyn                                       | 37.55                | 33.41 – 41.69 | 60.70               | 50.76 – 70.64   | 22.99                   | 20.24 – 25.74 | 14.81              | 6.67 – 22.95    |
| Sex (Male)                                           | 4.61                 | 1.99 – 7.23   | -8.20               | -14.59 – -1.82  |                         |               |                    |                 |
| ICC                                                  | 0.12                 |               | 0.14                |                 | 0.30                    |               | 0.31               |                 |
| N                                                    | 327 <sub>band</sub>  |               | 331 <sub>band</sub> |                 | 43 <sub>nest</sub>      |               | 43 <sub>nest</sub> |                 |
| Observations                                         | 1401                 |               | 1407                |                 | 521                     |               | 521                |                 |
| Marginal R <sup>2</sup> / Conditional R <sup>2</sup> | 0.471 / 0.535        |               | 0.201 / 0.310       |                 | 0.302 / 0.510           |               | 0.030 / 0.326      |                 |

**Table S4.** Results of linear mixed models on New York adults (upper) and nestlings (lower) with glucose as the response variable and corticosterone, mass, a corticosterone by mass interaction, and sex as predictors. In each case, the corticosterone measure included spans the same interval as the glucose response variable. Unsupported interactions were dropped. Corticosterone and mass are scaled to a mean of zero and standard deviation of one to make effect sizes easier to interpret.

| <i>Predictors</i>                                    | <b>Baseline Glucose</b> |                 |                  | <b>Induced - Base Glucose</b> |                |                  | <b>Post-Cortrosyn - Induced Glucose</b> |               |          |
|------------------------------------------------------|-------------------------|-----------------|------------------|-------------------------------|----------------|------------------|-----------------------------------------|---------------|----------|
|                                                      | <i>Estimates</i>        | <i>CI</i>       | <i>p</i>         | <i>Estimates</i>              | <i>CI</i>      | <i>p</i>         | <i>Estimates</i>                        | <i>CI</i>     | <i>p</i> |
| Intercept                                            | 213.39                  | 211.14 – 215.64 | <b>&lt;0.001</b> | 34.74                         | 30.76 – 38.71  | <b>&lt;0.001</b> | 17.48                                   | -0.21 – 35.17 | 0.053    |
| Corticosterone                                       | 1.66                    | -0.38 – 3.70    | 0.110            | 0.77                          | -2.89 – 4.44   | 0.679            | -5.89                                   | -14.83 – 3.06 | 0.191    |
| Mass                                                 | -2.90                   | -4.95 – -0.85   | <b>0.006</b>     | 1.44                          | -1.86 – 4.73   | 0.393            | 3.29                                    | -9.15 – 15.73 | 0.596    |
| Sex (male)                                           | -2.06                   | -8.88 – 4.76    | 0.555            | -14.58                        | -25.47 – -3.70 | <b>0.009</b>     |                                         |               |          |
| Corticosterone * Mass                                |                         |                 |                  | 4.34                          | 0.69 – 8.00    | <b>0.020</b>     |                                         |               |          |
| ICC                                                  | 0.04                    |                 |                  | 0.13                          |                |                  |                                         |               |          |
| N                                                    | 325 <sub>band</sub>     |                 |                  | 318 <sub>band</sub>           |                |                  |                                         |               |          |
| Observations                                         | 761                     |                 |                  | 568                           |                |                  | 45                                      |               |          |
| Marginal R <sup>2</sup> / Conditional R <sup>2</sup> | 0.014 / 0.057           |                 |                  | 0.027 / 0.156                 |                |                  | 0.049 / 0.003                           |               |          |

  

| <i>Predictors</i>                                    | <b>Baseline Glucose</b> |                 |                  | <b>Induced - Base Glucose</b> |                |                  | <b>Post-Cortrosyn - Induced Glucose</b> |                |          |
|------------------------------------------------------|-------------------------|-----------------|------------------|-------------------------------|----------------|------------------|-----------------------------------------|----------------|----------|
|                                                      | <i>Estimates</i>        | <i>CI</i>       | <i>p</i>         | <i>Estimates</i>              | <i>CI</i>      | <i>p</i>         | <i>Estimates</i>                        | <i>CI</i>      | <i>p</i> |
| Intercept                                            | 206.51                  | 195.22 – 217.80 | <b>&lt;0.001</b> | 17.45                         | 11.08 – 23.81  | <b>&lt;0.001</b> | -4.24                                   | -19.17 – 10.68 | 0.577    |
| Corticosterone                                       | -3.61                   | -10.71 – 3.50   | 0.320            | -5.52                         | -10.95 – -0.09 | <b>0.046</b>     | -4.05                                   | -14.90 – 6.81  | 0.465    |
| Mass                                                 | -2.48                   | -9.01 – 4.05    | 0.456            | 5.57                          | -0.19 – 11.33  | 0.058            | 9.14                                    | -3.43 – 21.71  | 0.154    |
| Corticosterone * Mass                                | 6.33                    | -0.10 – 12.76   | 0.054            |                               |                |                  |                                         |                |          |
| ICC                                                  | 0.60                    |                 |                  | 0.16                          |                |                  | 0.38                                    |                |          |
| N                                                    | 43 <sub>nest</sub>      |                 |                  | 41 <sub>nest</sub>            |                |                  | 39 <sub>nest</sub>                      |                |          |
| Observations                                         | 182                     |                 |                  | 172                           |                |                  | 151                                     |                |          |
| Marginal R <sup>2</sup> / Conditional R <sup>2</sup> | 0.032 / 0.614           |                 |                  | 0.047 / 0.200                 |                |                  | 0.025 / 0.392                           |                |          |

**Table S5.** Results of linear mixed models with baseline glucose or induced – baseline glucose as the response and corticosterone, mass, and their interaction as predictors in each of the four studied populations. Only adult females are included. Predictors are scaled to a mean of zero and standard deviation of one.

| Predictors                                           | AK Base Glucose |                 |                  | NY Base Glucose |                 |                  | TN Base Glucose |                 |                  | WY Base Glucose |                 |                  |
|------------------------------------------------------|-----------------|-----------------|------------------|-----------------|-----------------|------------------|-----------------|-----------------|------------------|-----------------|-----------------|------------------|
|                                                      | Estimates       | CI              | p                |
| Intercept                                            | 207.69          | 203.11 – 212.26 | <b>&lt;0.001</b> | 213.40          | 211.10 – 215.70 | <b>&lt;0.001</b> | 211.45          | 206.64 – 216.25 | <b>&lt;0.001</b> | 198.71          | 194.14 – 203.29 | <b>&lt;0.001</b> |
| Base Corticosterone                                  | 1.53            | -2.38 – 5.45    | 0.443            | 1.50            | -0.69 – 3.70    | 0.180            | -2.18           | -6.62 – 2.25    | 0.335            | -2.20           | -7.27 – 2.87    | 0.395            |
| Mass                                                 | -4.07           | -7.99 – -0.14   | <b>0.042</b>     | -2.99           | -5.19 – -0.78   | <b>0.008</b>     | -3.21           | -7.22 – 0.80    | 0.117            | -4.75           | -9.08 – -0.42   | <b>0.031</b>     |
| Corticosterone * Mass                                | -0.85           | -4.55 – 2.85    | 0.654            | 1.16            | -1.17 – 3.50    | 0.330            | 2.07            | -2.73 – 6.87    | 0.399            | 0.67            | -5.52 – 6.85    | 0.833            |
| ICC                                                  | 0.18            |                 |                  | 0.04            |                 |                  | 0.22            |                 |                  | 0.27            |                 |                  |
| N                                                    | 71              | band            |                  | 251             | band            |                  | 75              | band            |                  | 112             | band            |                  |
| Observations                                         | 198             |                 |                  | 684             |                 |                  | 184             |                 |                  | 203             |                 |                  |
| Marginal R <sup>2</sup> / Conditional R <sup>2</sup> | 0.026 / 0.197   |                 |                  | 0.015 / 0.054   |                 |                  | 0.023 / 0.239   |                 |                  | 0.031 / 0.292   |                 |                  |

  

| Predictors                                           | AK Induced - Base Glucose |               |                  | NY Induced - Base Glucose |               |                  | TN Induced - Base Glucose |               |                  | WY Induced - Base Glucose |               |                  |
|------------------------------------------------------|---------------------------|---------------|------------------|---------------------------|---------------|------------------|---------------------------|---------------|------------------|---------------------------|---------------|------------------|
|                                                      | Estimates                 | CI            | p                |
| Intercept                                            | 35.52                     | 28.41 – 42.62 | <b>&lt;0.001</b> | 34.68                     | 30.71 – 38.65 | <b>&lt;0.001</b> | 28.05                     | 22.21 – 33.90 | <b>&lt;0.001</b> | 47.45                     | 39.58 – 55.33 | <b>&lt;0.001</b> |
| Induced - Base Corticosterone                        | -0.24                     | -6.99 – 6.50  | 0.943            | 0.62                      | -3.18 – 4.42  | 0.749            | -1.35                     | -7.40 – 4.69  | 0.658            | 1.95                      | -5.82 – 9.71  | 0.620            |
| Mass                                                 | 2.52                      | -3.89 – 8.93  | 0.441            | 0.43                      | -3.04 – 3.90  | 0.809            | 1.88                      | -3.64 – 7.41  | 0.501            | 2.69                      | -4.78 – 10.16 | 0.477            |
| Corticosterone * Mass                                | 5.22                      | -2.38 – 12.82 | 0.178            | 3.98                      | 0.07 – 7.89   | <b>0.046</b>     | -2.79                     | -7.60 – 2.02  | 0.254            | 3.82                      | -2.70 – 10.34 | 0.248            |
| ICC                                                  | 0.12                      |               |                  | 0.13                      |               |                  |                           |               |                  |                           |               |                  |
| N                                                    | 69                        | band          |                  | 250                       | band          |                  |                           |               |                  |                           |               |                  |
| Observations                                         | 134                       |               |                  | 500                       |               |                  | 123                       |               |                  | 131                       |               |                  |
| Marginal R <sup>2</sup> / Conditional R <sup>2</sup> | 0.017 / 0.135             |               |                  | 0.008 / 0.139             |               |                  | 0.018 / -0.007            |               |                  | 0.017 / -0.007            |               |                  |
